# Supplementary material
Source: PubMed Central journal article supplement (PMC2206129)

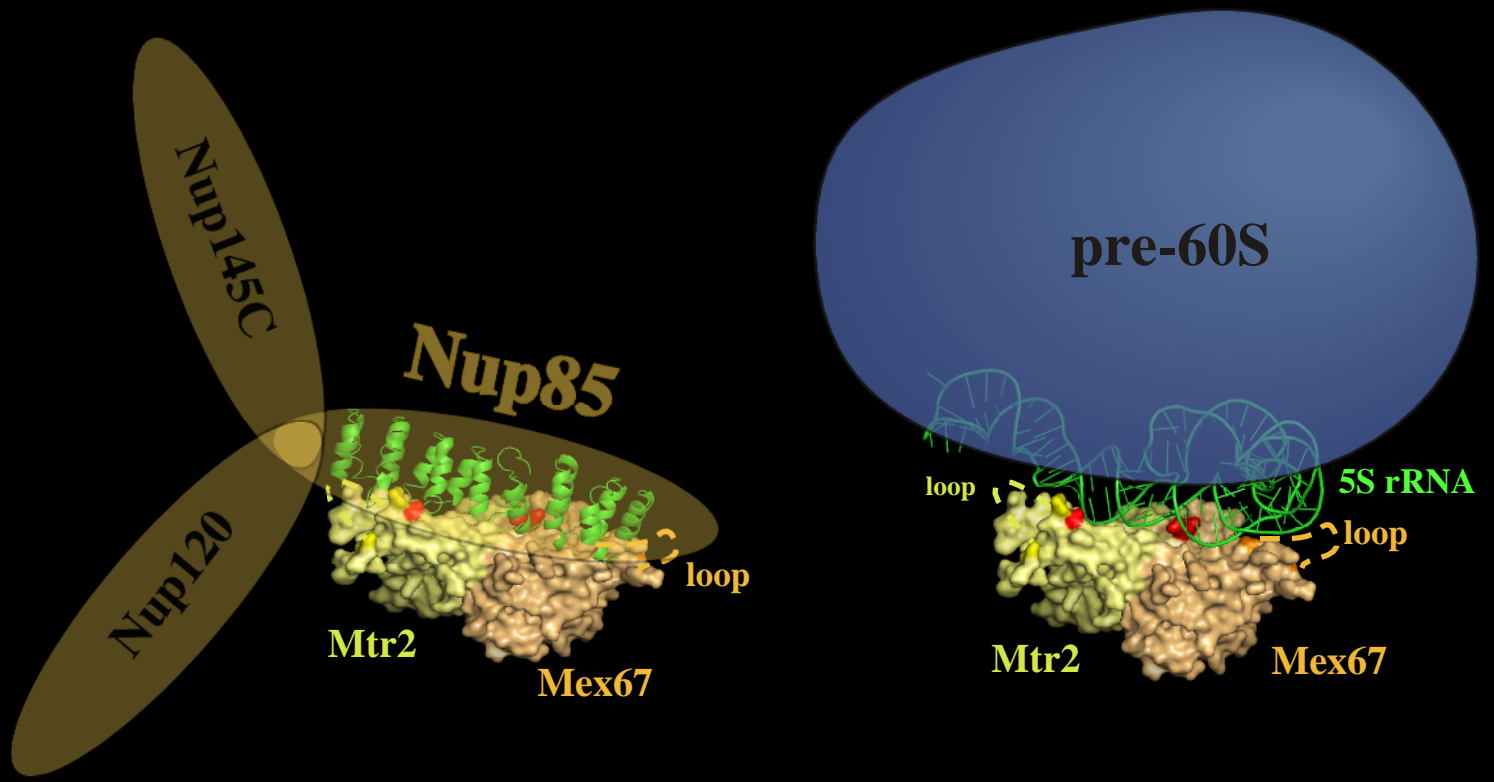

Figure 6 (Yao et al., 2007)

Supplement: 7601947s3.pdf [file 7601947s3.pdf]
